# Supplementary material for: Reduced relative fitness in hatchery‐origin Pink Salmon in two streams in Prince William Sound, Alaska
Source: PubMed Central journal article supplement (PMC8965367; doi:10.1111/eva.13356), 2022-03-15

# Hogan

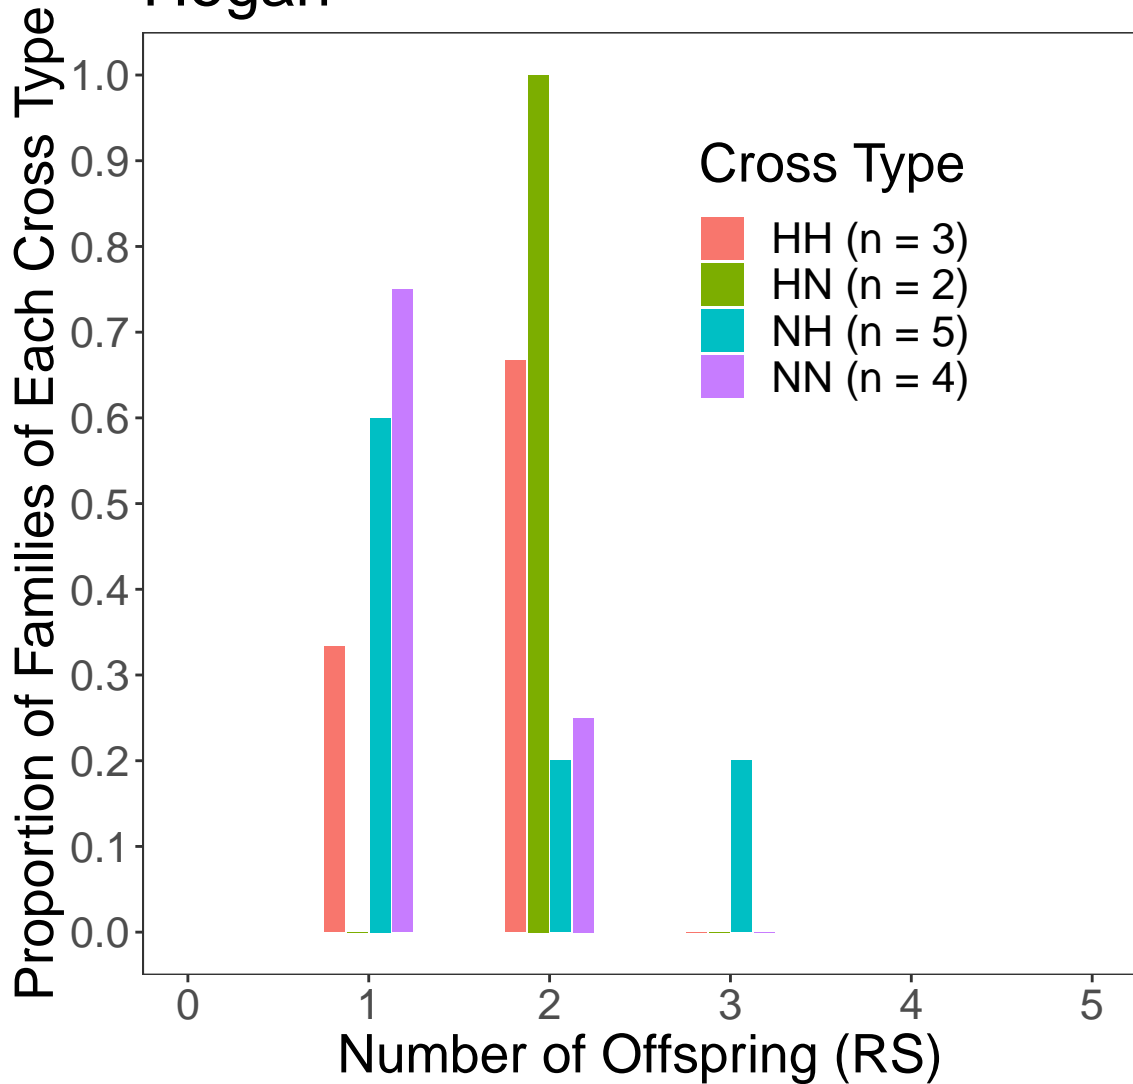

# Stockdale

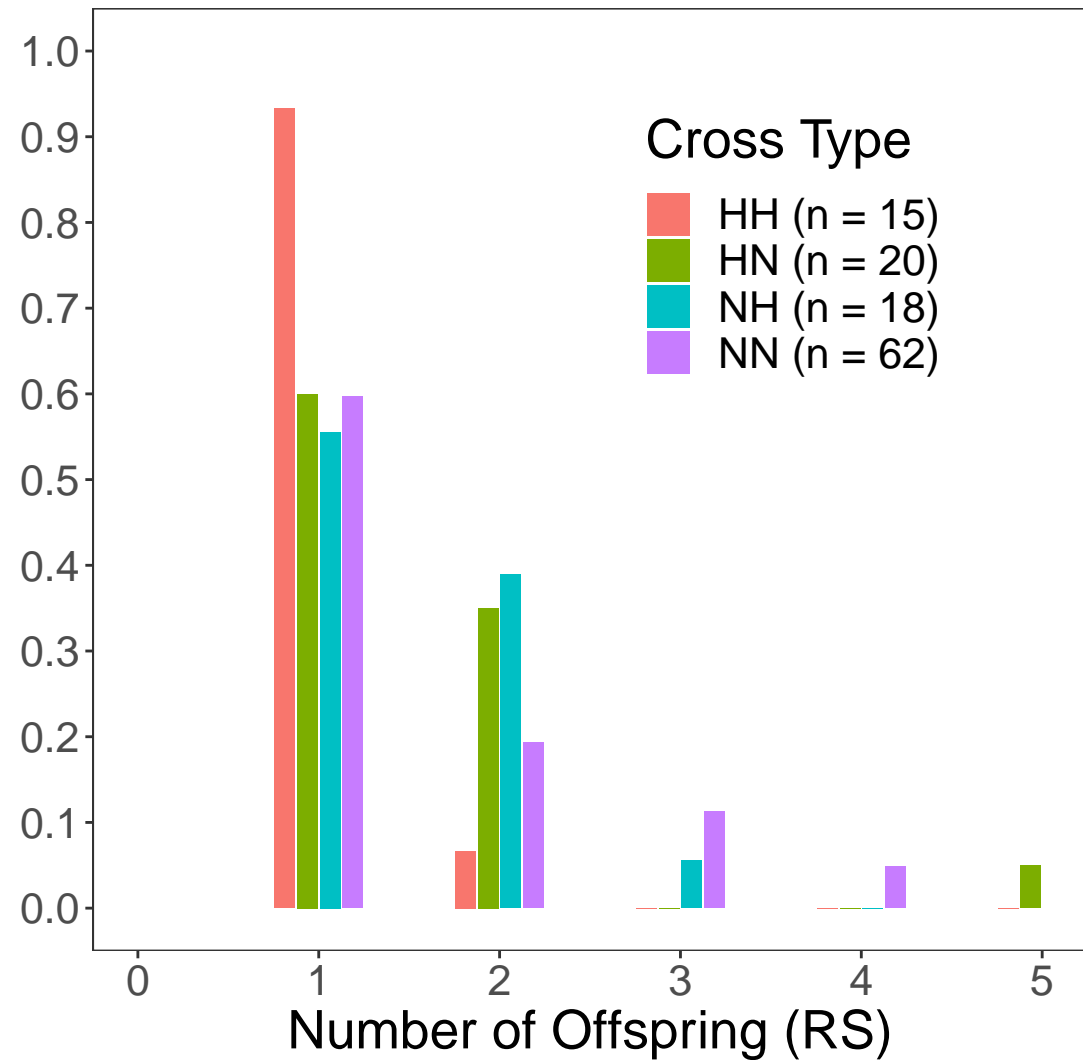

Supplement: EVA-15-429-s005.pdf [file EVA-15-429-s005.pdf]
